# Supplementary material for: Differentiation Potential of Human Wharton’s Jelly-Derived Mesenchymal Stem Cells and Paracrine Signaling Interaction Contribute to Improve the In Vitro Maturation of Mouse Cumulus Oocyte Complexes
Source: Hindawi journal article supplement (doi:10.1155/2018/7609284), 2018-10-11
Supplement: f1 [file 7609284.f1.pdf]

**Table S1**

| TYH Medium                                                          | (mg / 100ml)  |
|---------------------------------------------------------------------|---------------|
| BSA                                                                 | 300           |
| CaCl <sub>2</sub> ·2H <sub>2</sub> O                                | 25.1          |
| Glucose                                                             | 100.2         |
| KCl                                                                 | 35.6          |
| KH <sub>2</sub> PO <sub>4</sub>                                     | 16.2          |
| MgSO <sub>4</sub> ·7H <sub>2</sub> O                                | 29.3          |
| NaCl                                                                | 697.6         |
| NaHCO <sub>3</sub>                                                  | 210.6         |
| Phenol red                                                          | several drops |
| Sodium<br>pyruvate(C <sub>3</sub> H <sub>3</sub> NaO <sub>3</sub> ) | 11            |

**Table S2**

| Oligo name | Forward sequence (5' to 3') | Reverse sequence (5' to 3') | Product size (bp) | Accession number <sup>a</sup> |
|------------|-----------------------------|-----------------------------|-------------------|-------------------------------|
| ACTB       | CCTCATGAAGATCCTCACCGA       | TTGCCAATGGTGATGACCTGG       | 192               | XM_00671574                   |
| POUF51     | GTGTTTCAGCCAAAAGACCATCT     | GGCCTGCATGAGGGTTTCT         | 156               | NM_00115952                   |
